# Supplementary material
Source: PubMed Central journal article supplement (PMC6797900)
Supplement: CEI-198-184-s001.pdf [file CEI-198-184-s001.pdf]

**Table S1** Data filtering statistics.

| sample | raw reads  | clean reads | clean bases   | Low-quality<br>Reads Rate(%) | Q30 (%) |
|--------|------------|-------------|---------------|------------------------------|---------|
| C1     | 39,730,840 | 38,840,788  | 5,826,118,200 | 0.59                         | 95.62   |
| C2     | 39,331,572 | 38,355,994  | 5,753,399,100 | 0.76                         | 95.51   |
| C3     | 40,806,072 | 39,610,748  | 5,941,612,200 | 0.57                         | 96.09   |
| E1     | 40,608,684 | 39,708,358  | 5,956,253,700 | 0.62                         | 95.95   |
| E2     | 40,627,306 | 39,550,518  | 5,932,577,700 | 0.59                         | 95.9    |
| E3     | 40,887,112 | 39,169,804  | 5,875,470,600 | 1.02                         | 93.87   |
| P1     | 47,450,334 | 46,362,828  | 6,954,424,200 | 0.49                         | 96.27   |
| P2     | 41,561,450 | 40,140,224  | 6,021,033,600 | 0.6                          | 94.87   |
| P3     | 47,653,850 | 46,235,920  | 6,935,388,000 | 0.67                         | 95.11   |
| L1     | 45,474,400 | 44,003,540  | 6,600,531,000 | 0.75                         | 95.38   |
| L2     | 45,652,454 | 44,415,254  | 6,662,288,100 | 0.8                          | 95.23   |
| L3     | 49,330,868 | 47,810,886  | 7,171,632,900 | 0.83                         | 95.16   |

Low-quality reads, sequences removed because of a high number of low-quality bases; Q30, Percentage of bases with value >30 (error rate <0.1%) in the total sequence after filtration.

**Table S2** Clean read mapping statistical analysis.

| sample             | C1       | C2       | C3       | E1       | E2       | E3       | P1       | P2       | P3       | L1       | L2       | L3       |
|--------------------|----------|----------|----------|----------|----------|----------|----------|----------|----------|----------|----------|----------|
| Total              | 38,840,7 | 38,355,9 | 39,610,7 | 39,708,3 | 39,550,5 | 39,169,8 | 44,003,5 | 44,415,2 | 47,810,8 | 46,362,8 | 40,140,2 | 46,235,9 |
| Reads              | 88       | 94       | 48       | 58       | 18       | 04       | 40       | 54       | 86       | 28       | 24       | 20       |
| Mapped             | 37,417,1 | 36,868,6 | 38,190,4 | 38,264,6 | 38,024,7 | 37,533,9 | 42,282,6 | 42,688,3 | 45,910,9 | 44,640,0 | 38,571,0 | 44,310,1 |
| Reads              | 00       | 78       | 50       | 40       | 39       | 70       | 11       | 85       | 93       | 78       | 71       | 09       |
| Mapping<br>Rate    | 0.9633   | 0.9612   | 0.9641   | 0.9636   | 0.9614   | 0.9582   | 0.9609   | 0.9611   | 0.9603   | 0.9628   | 0.9609   | 0.9583   |
| UnMappe<br>d Reads | 1,423,68 | 1,487,31 | 1,420,29 | 1,443,71 | 1,525,77 | 1,635,83 | 1,720,92 | 1,726,86 | 1,899,89 | 1,722,75 | 1,569,15 | 1,925,81 |
| MultiMap<br>Reads  | 8        | 6        | 8        | 8        | 9        | 4        | 9        | 9        | 3        | 0        | 3        | 1        |
| MultiMap<br>Reads  | 2,143,02 | 2,007,34 | 2,119,50 | 2,134,95 | 2,183,45 | 2,272,09 | 2,447,40 | 2,552,37 | 2,628,49 | 2,687,33 | 2,287,14 | 2,546,33 |
| Reads              | 8        | 4        | 7        | 4        | 2        | 4        | 4        | 1        | 3        | 9        | 8        | 8        |

Total Reads, total number of sequences after filtration; Mapped/Unmapped Reads, number of sequences mapped/not mapped into a genome; MultiMap Reads, number of sequences aligned to multiple locations in the genome.

**Table S3** Differential expressed genes in sciatic nerves at different stages of EAN. Adjusted *P*-value < 0.05 and |log<sub>2</sub> fold change| ≥ 1. FC, fold change.

a. early neuritis vs. control. b. peak neuritis vs. control. c. late neuritis vs. control.

(a) early neuritis vs. control

| gene             | log <sub>2</sub> FC | <i>P</i> adj | trend | gene           | log <sub>2</sub> FC | <i>P</i> adj | trend |
|------------------|---------------------|--------------|-------|----------------|---------------------|--------------|-------|
| <i>Mrgprg</i>    | -2.213              | 2.91E-07     | down  | <i>Tnfaip6</i> | -1.043              | 0.043        | down  |
| <i>Fosb</i>      | -2.092              | 4.55E-08     | down  | <i>Col8a1</i>  | -1.012              | 0.023        | down  |
| <i>Cpa3</i>      | -1.545              | 5.19E-04     | down  | <i>Slc4a1</i>  | 1.211               | 0.048        | up    |
| <i>Ms4a2</i>     | -1.544              | 5.36E-04     | down  | <i>Emb</i>     | 1.245               | 0.048        | up    |
| <i>Egr1</i>      | -1.453              | 8.98E-04     | down  | <i>C3</i>      | 1.267               | 0.050        | up    |
| <i>Pi15</i>      | -1.450              | 6.478E-03    | down  | <i>Plac8</i>   | 1.275               | 0.029        | up    |
| <i>Smpd3</i>     | -1.446              | 0.013        | down  | <i>Hhat1</i>   | 1.282               | 0.042        | up    |
| <i>Mrgprb3</i>   | -1.407              | 0.006        | down  | <i>Smpx</i>    | 1.288               | 0.041        | up    |
| <i>Fos</i>       | -1.374              | 6.92E-04     | down  | <i>Alox15</i>  | 1.295               | 0.029        | up    |
| <i>Adgrd1</i>    | -1.218              | 1.01E-03     | down  | <i>Hba-a2</i>  | 1.297               | 0.029        | up    |
| <i>Hmcn2</i>     | -1.188              | 0.037        | down  | <i>Illrn</i>   | 1.337               | 0.030        | up    |
| <i>Xkr7</i>      | -1.150              | 0.011        | down  | <i>Lilrb4</i>  | 1.349               | 0.020        | up    |
| <i>Sema3c</i>    | -1.097              | 7.72E-04     | down  | <i>Lgals5</i>  | 1.364               | 0.026        | up    |
| <i>DEPP</i>      | -1.083              | 0.048        | down  | <i>Alas2</i>   | 1.474               | 0.011        | up    |
| <i>F3</i>        | -1.068              | 0.039        | down  | <i>Car2</i>    | 1.610               | 0.001        | up    |
| <i>Sik1</i>      | -1.063              | 0.037        | down  | <i>Fabp3</i>   | 2.009               | 2.91E-07     | up    |
| <i>Tnfrsf11b</i> | -1.043              | 0.028        | down  |                |                     |              |       |

(b) peak neuritis vs. control

| gene       | log <sub>2</sub> FC | <i>P</i> adj | trend | gene           | log <sub>2</sub> FC | <i>P</i> adj | trend |
|------------|---------------------|--------------|-------|----------------|---------------------|--------------|-------|
| <i>Lep</i> | -2.015              | 4.35E-08     | down  | <i>Angptl4</i> | 1.264               | 3.48E-04     | up    |

---

|                 |        |          |      |                 |       |          |    |
|-----------------|--------|----------|------|-----------------|-------|----------|----|
| <i>Oxtr</i>     | -1.721 | 3.64E-05 | down | <i>Ccl9</i>     | 1.264 | 9.39E-03 | up |
| <i>Cyp2c11</i>  | -1.251 | 3.82E-03 | down | <i>Gbp2</i>     | 1.273 | 5.09E-05 | up |
| <i>Epyc</i>     | -1.213 | 3.91E-04 | down | <i>Add2</i>     | 1.275 | 4.71E-03 | up |
| <i>Cilp</i>     | -1.204 | 1.46E-02 | down | <i>Csf2rb</i>   | 1.275 | 2.04E-04 | up |
| <i>Nr1d1</i>    | -1.126 | 3.79E-05 | down | <i>Sln</i>      | 1.275 | 3.22E-04 | up |
| <i>Smpd3</i>    | -1.090 | 0.034    | down | <i>Emb</i>      | 1.281 | 8.28E-03 | up |
| <i>Egr1</i>     | -1.072 | 0.016    | down | <i>Hbb</i>      | 1.282 | 7.98E-03 | up |
| <i>Adamts16</i> | -1.023 | 0.024    | down | <i>Il2rg</i>    | 1.282 | 1.69E-03 | up |
| <i>Idi1</i>     | -1.020 | 0.013    | down | <i>Bst1</i>     | 1.291 | 4.81E-03 | up |
| <i>Col26a1</i>  | -1.004 | 0.014    | down | <i>SI00a8</i>   | 1.306 | 5.21E-03 | up |
| <i>Slco2a1</i>  | 1.005  | 0.007    | up   | <i>Lilrb3</i>   | 1.322 | 1.17E-03 | up |
| <i>Marc1</i>    | 1.015  | 0.044    | up   | <i>Ccl19</i>    | 1.325 | 4.04E-03 | up |
| <i>Akr1cl</i>   | 1.015  | 1.74E-05 | up   | <i>Arl5c</i>    | 1.329 | 5.01E-03 | up |
| <i>Fam110d</i>  | 1.017  | 4.71E-03 | up   | <i>Gpihbp1</i>  | 1.374 | 1.47E-04 | up |
| <i>Vcam1</i>    | 1.018  | 0.002    | up   | <i>Fcgr3a</i>   | 1.374 | 0.003    | up |
| <i>Stambpl1</i> | 1.023  | 0.024    | up   | <i>Olr1</i>     | 1.385 | 0.003    | up |
| <i>Itgax</i>    | 1.024  | 0.007    | up   | <i>Psmb8</i>    | 1.386 | 1.32E-05 | up |
| <i>Hmgcs2</i>   | 1.033  | 0.041    | up   | <i>SI00a9</i>   | 1.399 | 0.002    | up |
| <i>RT1-Db1</i>  | 1.039  | 0.009    | up   | <i>Gprin3</i>   | 1.399 | 0.002    | up |
| <i>Rasa4</i>    | 1.043  | 0.001    | up   | <i>Apol11a</i>  | 1.413 | 1.12E-07 | up |
| <i>RT1-Da</i>   | 1.049  | 0.009    | up   | <i>Upp1</i>     | 1.416 | 1.12E-07 | up |
| <i>Igtp</i>     | 1.050  | 2.33E-03 | up   | <i>Mt2A</i>     | 1.446 | 2.11E-04 | up |
| <i>Arhgap27</i> | 1.057  | 1.82E-02 | up   | <i>Psmb9</i>    | 1.454 | 1.08E-08 | up |
| <i>Ccl2</i>     | 1.075  | 4.39E-02 | up   | <i>Il1rn</i>    | 1.471 | 1.00E-03 | up |
| <i>Bin2a</i>    | 1.081  | 4.49E-02 | up   | <i>Tap1</i>     | 1.479 | 4.46E-06 | up |
| <i>Plaur</i>    | 1.082  | 9.27E-03 | up   | <i>Cyp2e1</i>   | 1.486 | 1.87E-04 | up |
| <i>Il2rb</i>    | 1.085  | 4.39E-02 | up   | <i>Lcn2</i>     | 1.491 | 4.74E-05 | up |
| <i>Tkl1</i>     | 1.093  | 2.47E-02 | up   | <i>Tnfrsf14</i> | 1.500 | 5.39E-04 | up |
| <i>Akr1b10</i>  | 1.095  | 1.51E-02 | up   | <i>Scimp</i>    | 1.509 | 5.07E-04 | up |

---

|                |       |          |    |                     |       |          |    |
|----------------|-------|----------|----|---------------------|-------|----------|----|
| <i>Jak3</i>    | 1.097 | 1.36E-03 | up | <i>Chi3l1</i>       | 1.515 | 1.69E-05 | up |
| <i>Plvap</i>   | 1.099 | 7.80E-03 | up | <i>Gngt2</i>        | 1.517 | 8.68E-06 | up |
| <i>Cxcl14</i>  | 1.100 | 8.63E-05 | up | <i>Irf1</i>         | 1.527 | 5.20E-08 | up |
| <i>Ahsp</i>    | 1.103 | 4.11E-02 | up | <i>Clec4e</i>       | 1.533 | 4.14E-04 | up |
| <i>Fcgr2b</i>  | 1.104 | 2.56E-04 | up | <i>Rhd</i>          | 1.557 | 3.23E-04 | up |
| <i>Pla2g7</i>  | 1.105 | 3.97E-02 | up | <i>Hba-a3</i>       | 1.558 | 6.35E-05 | up |
| <i>Hbq1b</i>   | 1.111 | 2.71E-02 | up | <i>Lyz2</i>         | 1.575 | 1.65E-05 | up |
| <i>RT1-N2</i>  | 1.115 | 3.70E-03 | up | <i>Fchol</i>        | 1.579 | 2.04E-04 | up |
| <i>Slamf8</i>  | 1.120 | 3.33E-02 | up | <i>LOC103694855</i> | 1.592 | 8.26E-05 | up |
| <i>Scnn1g</i>  | 1.120 | 2.84E-02 | up | <i>Hk3</i>          | 1.598 | 1.53E-04 | up |
| <i>APOL3</i>   | 1.122 | 3.29E-02 | up | <i>Car2</i>         | 1.610 | 7.36E-05 | up |
| <i>ECYT6</i>   | 1.123 | 3.29E-02 | up | <i>Trpm2</i>        | 1.618 | 8.26E-05 | up |
| <i>Slc11a1</i> | 1.132 | 1.68E-02 | up | <i>Ass1</i>         | 1.637 | 6.86E-05 | up |
| <i>Mctp1</i>   | 1.133 | 3.18E-03 | up | <i>MGC105649</i>    | 1.660 | 1.65E-05 | up |
| <i>Ccr5</i>    | 1.139 | 2.69E-02 | up | <i>Acod1</i>        | 1.703 | 2.86E-05 | up |
| <i>Ifitm1</i>  | 1.142 | 3.64E-05 | up | <i>LOC500712</i>    | 1.732 | 7.28E-06 | up |
| <i>Mcempl</i>  | 1.142 | 2.70E-02 | up | <i>Cxcl13</i>       | 1.753 | 3.17E-06 | up |
| <i>Klrb1a</i>  | 1.146 | 2.84E-02 | up | <i>Nlrc5</i>        | 1.761 | 9.99E-09 | up |
| <i>Cd8a</i>    | 1.149 | 1.61E-02 | up | <i>Ccl5</i>         | 1.794 | 4.90E-06 | up |
| <i>Nilr1</i>   | 1.153 | 2.45E-02 | up | <i>Hba-a2</i>       | 1.803 | 1.19E-06 | up |
| <i>Dok3</i>    | 1.155 | 0.016    | up | <i>Cxcl11</i>       | 1.808 | 1.12E-05 | up |
| <i>RT1-CE4</i> | 1.156 | 4.30E-05 | up | <i>Plac8</i>        | 1.844 | 5.76E-11 | up |
| <i>Coch</i>    | 1.160 | 2.54E-02 | up | <i>Tnnt1</i>        | 1.851 | 5.82E-06 | up |
| <i>Pgm5</i>    | 1.160 | 5.68E-05 | up | <i>Hba-a2</i>       | 1.868 | 3.85E-07 | up |
| <i>Cd300lg</i> | 1.163 | 0.021    | up | <i>Rbp7</i>         | 1.874 | 4.27E-10 | up |
| <i>Fam167b</i> | 1.194 | 3.78E-03 | up | <i>Selp</i>         | 1.894 | 1.82E-13 | up |

|                |       |          |    |                 |       |          |    |
|----------------|-------|----------|----|-----------------|-------|----------|----|
| <i>Plxna4</i>  | 1.201 | 0.018    | up | <i>Lbp</i>      | 1.969 | 1.82E-11 | up |
| <i>Itgal</i>   | 1.216 | 0.014    | up | <i>Lilrb4</i>   | 2.010 | 1.21E-07 | up |
| <i>Lst1</i>    | 1.216 | 0.015    | up | <i>Cxcl9</i>    | 2.058 | 1.08E-08 | up |
| <i>Sectm1a</i> | 1.221 | 0.013    | up | <i>Trim63</i>   | 2.093 | 5.58E-10 | up |
| <i>Abi3</i>    | 1.243 | 1.65E-04 | up | <i>Alas2</i>    | 2.243 | 6.25E-10 | up |
| <i>Sell</i>    | 1.248 | 9.26E-03 | up | <i>Lgals5</i>   | 2.287 | 1.54E-10 | up |
| <i>Irf4</i>    | 1.254 | 8.38E-03 | up | <i>RT1-CE5</i>  | 2.412 | 5.68E-25 | up |
| <i>Gbp5</i>    | 1.254 | 7.36E-05 | up | <i>RGD13051</i> |       |          |    |
|                |       |          |    | 84              | 2.477 | 3.19E-12 | up |
| <i>Myh7</i>    | 1.255 | 8.74E-03 | up | <i>Alox15</i>   | 2.567 | 4.07E-13 | up |
| <i>Sectm1b</i> | 1.258 | 7.80E-03 | up | <i>C3</i>       | 2.567 | 1.05E-14 | up |
| <i>Bid</i>     | 1.260 | 6.83E-03 | up | <i>Slc4a1</i>   | 2.881 | 4.78E-17 | up |
| <i>Slfn4</i>   | 1.263 | 6.70E-05 | up | <i>Ubd</i>      | 3.977 | 1.09E-37 | up |
| <i>Htr2b</i>   | 1.263 | 1.11E-03 | up |                 |       |          |    |

(c) late neuritis vs. control

| gene              | log <sub>2</sub> FC | P adj    | trend | gene           | log <sub>2</sub> FC | P adj    | trend |
|-------------------|---------------------|----------|-------|----------------|---------------------|----------|-------|
| <i>Fosb</i>       | -1.637              | 4.57E-08 | down  | <i>Kcnc4</i>   | 1.228               | 1.02E-03 | up    |
| <i>Egr1</i>       | -1.076              | 3.08E-03 | down  | <i>Hk3</i>     | 1.228               | 2.33E-03 | up    |
| <i>Clec7a</i>     | 1.008               | 1.07E-02 | up    | <i>Hba-a2</i>  | 1.232               | 7.52E-04 | up    |
| <i>Mmp8</i>       | 1.011               | 2.50E-02 | up    | <i>Prcl</i>    | 1.235               | 1.31E-04 | up    |
| <i>Fcgr3a</i>     | 1.012               | 2.13E-02 | up    | <i>Ppp1r1a</i> | 1.239               | 1.34E-03 | up    |
| <i>LOC1036948</i> |                     |          |       | <i>Rtn2</i>    | 1.242               | 1.50E-03 | up    |
| 55                | 1.020               | 2.50E-02 | up    | <i>Sln</i>     | 1.253               | 4.88E-04 | up    |
| <i>Plac8</i>      | 1.022               | 7.33E-03 | up    | <i>Cthrc1</i>  | 1.260               | 8.03E-04 | up    |
| <i>Top2a</i>      | 1.026               | 2.50E-02 | up    | <i>Hbb</i>     | 1.271               | 1.11E-03 | up    |
| <i>Tmem38a</i>    | 1.027               | 2.24E-02 | up    | <i>Csf3r</i>   | 1.272               | 7.00E-04 | up    |
| <i>Gbp2</i>       | 1.030               | 2.82E-03 | up    | <i>Hba-a2</i>  | 1.280               | 4.95E-04 | up    |
| <i>Bid</i>        | 1.044               | 1.34E-02 | up    |                |                     |          |       |

|                   |       |          |    |                |       |          |    |
|-------------------|-------|----------|----|----------------|-------|----------|----|
| <i>Popdc3</i>     | 1.053 | 1.68E-02 | up | <i>Aqp4</i>    | 1.283 | 6.08E-04 | up |
| <i>Alox15</i>     | 1.055 | 1.25E-02 | up | <i>Myog</i>    | 1.289 | 6.82E-04 | up |
| <i>Myf6</i>       | 1.056 | 1.03E-02 | up | <i>Ngfr</i>    | 1.326 | 6.08E-04 | up |
| <i>Cdca3</i>      | 1.076 | 1.38E-02 | up | <i>Car2</i>    | 1.331 | 2.84E-03 | up |
| <i>Emb</i>        | 1.084 | 1.36E-02 | up | <i>Scimp</i>   | 1.367 | 3.42E-04 | up |
| <i>Slc38a3</i>    | 1.089 | 1.28E-02 | up | <i>Ccl5</i>    | 1.377 | 2.24E-04 | up |
| <i>Nlrc5</i>      | 1.090 | 3.77E-03 | up | <i>Lgals5</i>  | 1.391 | 2.26E-04 | up |
| <i>Pcsk1</i>      | 1.094 | 1.23E-02 | up | <i>RT1-CE5</i> | 1.449 | 6.55E-08 | up |
| <i>Iqgap3</i>     | 1.098 | 8.18E-03 | up | <i>Cxcl13</i>  | 1.477 | 4.57E-08 | up |
| <i>Tkl1</i>       | 1.117 | 7.33E-03 | up | <i>Alas2</i>   | 1.522 | 1.07E-05 | up |
| <i>Cxcl9</i>      | 1.148 | 3.08E-03 | up | <i>C3</i>      | 1.524 | 8.78E-06 | up |
| <i>LOC1036948</i> |       |          |    |                |       |          |    |
| 57                | 1.155 | 5.40E-03 | up | <i>Sell</i>    | 1.562 | 7.69E-06 | up |
| <i>Lyz2</i>       | 1.162 | 5.57E-08 | up | <i>Trpm2</i>   | 1.651 | 2.97E-07 | up |
| <i>Olr1</i>       | 1.170 | 4.80E-03 | up | <i>Fabp3</i>   | 1.667 | 8.85E-08 | up |
| <i>Neurl1</i>     | 1.171 | 3.77E-03 | up | <i>Trim63</i>  | 1.671 | 8.85E-08 | up |
| <i>Ptprn</i>      | 1.178 | 3.08E-03 | up | <i>Hhat1</i>   | 1.687 | 6.89E-07 | up |
| <i>Gngt2</i>      | 1.180 | 7.00E-04 | up | <i>Lilrb4</i>  | 1.791 | 5.06E-10 | up |
| <i>Tuba4a</i>     | 1.181 | 3.77E-03 | up | <i>S100a8</i>  | 1.797 | 7.55E-08 | up |
| <i>Il1rn</i>      | 1.185 | 3.68E-03 | up | <i>Ubd</i>     | 2.197 | 8.64E-12 | up |
